# Supplementary material for: High Growing Temperature Changes Nutritional Value of Broccoli (Brassica oleracea L. convar. botrytis (L.) Alef. var. cymosa Duch.) Seedlings
Source: MDPI journal article supplement (doi:10.3390/foods12030582), 2023-01-29
Supplement: s1 [file s1]

**Table S1.** Method detection limits (MDL) and results of the element quantification in standard reference materials used for quality control.

| Element |                  | MDL * | NIST SRM 1570a<br>Spinach Leaves         |                             | NIST SRM 1573a<br>Tomato Leaves          |                             |
|---------|------------------|-------|------------------------------------------|-----------------------------|------------------------------------------|-----------------------------|
|         |                  |       | Certified<br>(mean $\pm$<br>uncertainty) | Measured<br>(mean $\pm$ SD) | Certified<br>(mean $\pm$<br>uncertainty) | Measured<br>(mean $\pm$ SD) |
| As      | $\mu\text{g/kg}$ | 3.26  | $68 \pm 12$                              | $67 \pm 5$                  | $112.6 \pm 2.4$                          | $111.0 \pm 4.9$             |
| Ca      | $\text{mg/kg}$   | 7.87  | $15260 \pm 660$                          | $15177 \pm 654$             | $50500 \pm 900$                          | $50187 \pm 758$             |
| Cd      | $\mu\text{g/kg}$ | 0.375 | $2876 \pm 58$                            | $2836 \pm 71$               | $1517 \pm 27$                            | $1520 \pm 93$               |
| Co      | $\mu\text{g/kg}$ | 0.916 | $393 \pm 30$                             | $398 \pm 7$                 | $577.3 \pm 7.1$                          | $566.9 \pm 26.1$            |
| Cr      | $\mu\text{g/kg}$ | 6.67  | /                                        | $1671 \pm 125$              | $1990 \pm 60$                            | $1935 \pm 46$               |
| Cu      | $\text{mg/kg}$   | 0.116 | $12220 \pm 860$                          | $12250 \pm 890$             | $4700 \pm 140$                           | $4620 \pm 100$              |
| Fe      | $\text{mg/kg}$   | 1.27  | /                                        | $272 \pm 15$                | $368 \pm 7$                              | $367 \pm 2$                 |
| Hg      | $\mu\text{g/kg}$ | 2.70  | $29.7 \pm 2.1$                           | $28.8 \pm 0.4$              | $34.1 \pm 1.5$                           | $34.8 \pm 4.3$              |
| K       | $\text{mg/kg}$   | 37.12 | $29000 \pm 260$                          | $29723 \pm 500$             | $27000 \pm 500$                          | $27794 \pm 783$             |
| Mg      | $\text{mg/kg}$   | 2.81  | 9000                                     | $8877 \pm 31$               | 12000                                    | $12062 \pm 207$             |
| Mn      | $\text{mg/kg}$   | 0.007 | $76.0 \pm 1.2$                           | $73.8 \pm 3.3$              | $246 \pm 8$                              | $246 \pm 4$                 |
| Na      | $\text{mg/kg}$   | 3.35  | $18210 \pm 230$                          | $18631 \pm 724$             | $136 \pm 4$                              | $138 \pm 2.0$               |
| Ni      | $\mu\text{g/kg}$ | 5.01  | $2142 \pm 58$                            | $2181 \pm 69$               | $1582 \pm 41$                            | $1527 \pm 71$               |
| P       | $\text{mg/kg}$   | 12.26 | $5190 \pm 67$                            | $5359 \pm 83$               | $2161 \pm 28$                            | $2204 \pm 88$               |
| Pb      | $\mu\text{g/kg}$ | 1.399 | 200 <sup>b</sup>                         | $202 \pm 7$                 | /                                        | $557 \pm 45$                |
| Se      | $\mu\text{g/kg}$ | 5.5   | $115.2 \pm 4$                            | $112.5 \pm 2.8$             | $54 \pm 3$                               | $54.8 \pm 3.8$              |
| Sn      | $\mu\text{g/kg}$ | 2.34  | /                                        | $27.6 \pm 1.3$              | /                                        | $48.4 \pm 7.3$              |
| Tl      | $\mu\text{g/kg}$ | 0.453 | /                                        | $21.0 \pm 1.0$              | /                                        | $37.9 \pm 2.6$              |
| Zn      | $\text{mg/kg}$   | 0.067 | $82.3 \pm 3.9$                           | $83.2 \pm 3.1$              | $30.9 \pm 0.7$                           | $31.9 \pm 0.9$              |

\*Calculated as mean plus three times of the blanks' standard deviation multiplied by dilution factor information value.
